# Supplementary material for: Use of End-of-Class Quizzes to Promote Pharmacy Student Self-Reflection, Motivate Students to Improve Study Habits, and to Improve Performance on Summative Examinations
Source: MDPI journal article supplement (doi:10.3390/pharmacy8030167), 2020-09-10
Supplement: s1 [file s1]

**Supplementary Table S1:** Survey data.

| Question                                                                                                                           | Strongly Disagree | Disagree | Neutral | Agree | Strongly Agree |
|------------------------------------------------------------------------------------------------------------------------------------|-------------------|----------|---------|-------|----------------|
| 1. The quiz questions were clearly written and understandable                                                                      | 0                 | 3        | 10      | 51    | 36             |
| 2. Sufficient time was provided to complete the quizzes                                                                            | 0                 | 0        | 1       | 28    | 71             |
| 3. The quizzes helped me identify gaps in knowledge and understanding of key concepts                                              | 0                 | 4        | 7       | 41    | 48             |
| 4. The quizzes helped me determine whether or not I can effectively answer critical thinking-type questions relating to each topic | 2                 | 2        | 6       | 46    | 46             |
| 5. If I received a score of less than 70% on a quiz I would feel compelled to spend more time studying the related topic           | 2                 | 3        | 12      | 30    | 53             |
| 6. If I received a score of less than 70% on an quiz I would feel compelled to attend review sessions                              | 5                 | 13       | 22      | 28    | 33             |
| 7. If I received a score of less than 70% on an quiz I would feel compelled to attend office hours                                 | 6                 | 29       | 38      | 19    | 9              |
| 8. The quizzes have increased my confidence levels                                                                                 | 6                 | 7        | 26      | 45    | 16             |
| 9. The quizzes have increased my stress levels                                                                                     | 3                 | 28       | 25      | 28    | 17             |
| 10. The quizzes have decreased my enjoyment of this course                                                                         | 13                | 33       | 36      | 15    | 3              |
